# Supplementary material
Source: PubMed Central journal article supplement (PMC547889)

**A**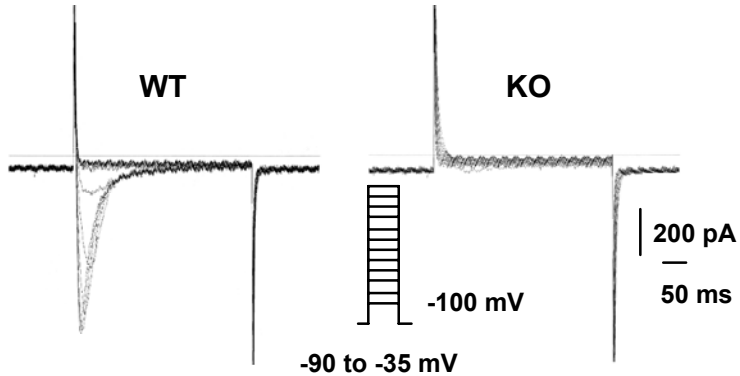**B**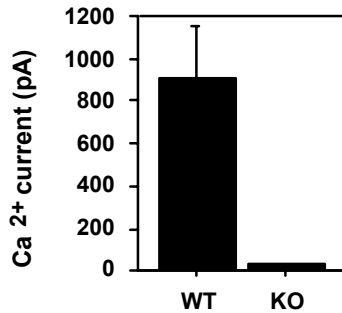

Supplement: pnas_102_5_1743__1.pdf [file pnas_102_5_1743__1.pdf]

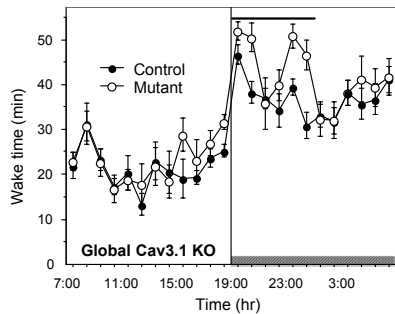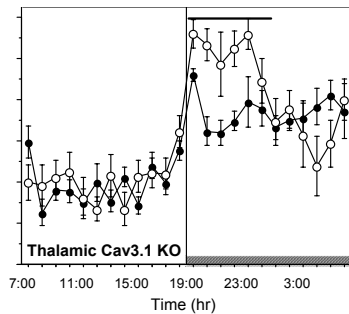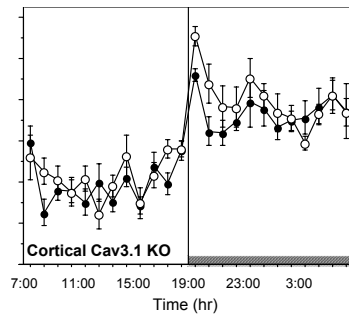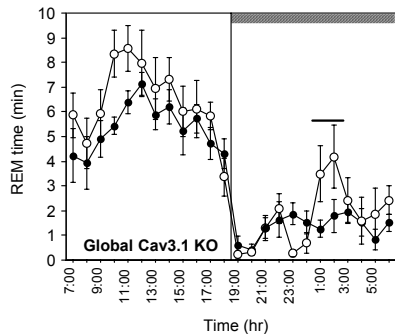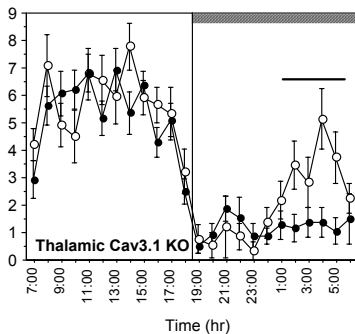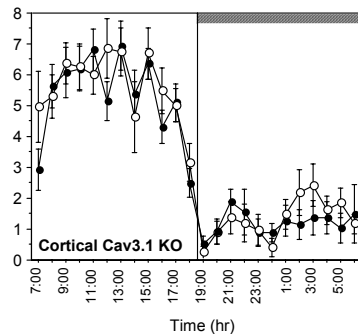

Supplement: pnas_102_5_1743__2.pdf [file pnas_102_5_1743__2.pdf]
